# Supplementary material for: Emergent Stem Cell Homeostasis in the C. elegans Germline Is Revealed by Hybrid Modeling
Source: PubMed Central journal article supplement (PMC4621618; doi:10.1016/j.bpj.2015.06.007), 2015-07-21

**Biophysical Journal**

**Supporting Material**

**Emergent Stem Cell Homeostasis in the *C. elegans* Germline Is Revealed by Hybrid Modeling**

Benjamin A. Hall,<sup>1,2,\*</sup> Nir Piterman,<sup>3</sup> Alex Hajnal,<sup>4</sup> and Jasmin Fisher<sup>2,5,\*</sup>

<sup>1</sup>Medical Research Council Cancer Unit, Hutchison/Medical Research Council Research Centre, University of Cambridge, Cambridge, United Kingdom; <sup>2</sup>Microsoft Research Cambridge, Cambridge, UK; <sup>3</sup>Department of Computer Science, University of Leicester, Leicester, UK; <sup>4</sup>Institute of Molecular Life Sciences, University of Zurich, Zurich, Switzerland; and <sup>5</sup>Department of Biochemistry, University of Cambridge, Cambridge, UK

## Supplementary information

### Supplementary Figure 1.

Birth, death and fertilisation over time. Over the 3 week lifetime of the animal 150 oocytes mature per arm of the gonad, with roughly one cell maturing per  $\sim 23$  minutes. Here we observe exhaustion of the sperm after 4 weeks, and one cell maturing every  $\sim 60$  minutes.

### Supplementary Video 1.

Dynamic lineages. One cell early in the simulation is selected, and its motions and the motions of its descendants are plotted as a line. Motions in the mitotic zone are random, whilst outside of the region cells move in a single direction along the length of the gonad. Births are indicated by a blue sphere in the path, whilst deaths are indicated by a red sphere.

### Supplementary Video 2.

Dynamics of cell lineages over time. All cells at a single time point are assigned a colour, and from then onwards all descendants of these cells retain the same colour.

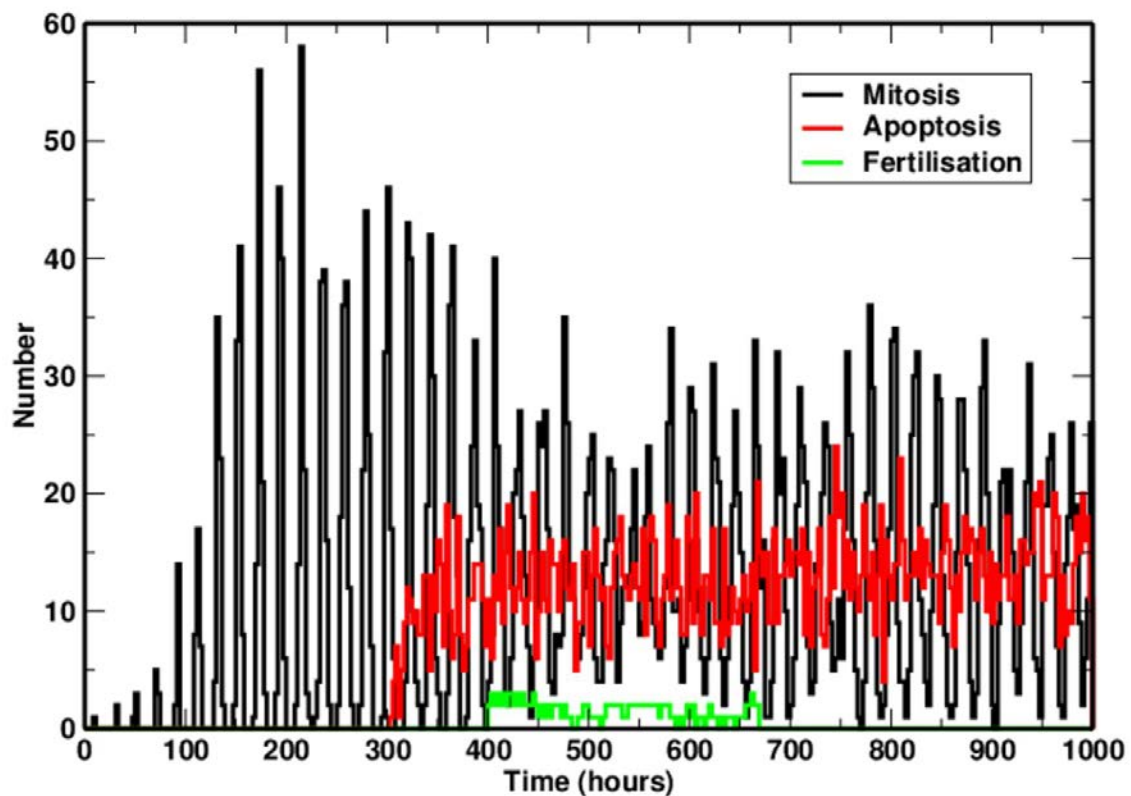

Supplement: mmc1.pdf [file mmc1.pdf]
